# Supplementary material for: Antimicrobial stewardship and infection prevention interventions targeting healthcare-associated Clostridioides difficile and carbapenem-resistant Klebsiella pneumoniae infections: a scoping review
Source: PubMed Central journal article supplement — BMJ Open. 2021 Aug 4;11(8):e051983. doi: 10.1136/bmjopen-2021-051983 (PMC8340296; doi:10.1136/bmjopen-2021-051983), 2021-08-04
Supplement: bmjopen-2021-051983supp001.pdf [file bmjopen-2021-051983supp001.pdf]

## Appendix 1: Search strategy

### a. MEDLINE search strategy

| Search ID | Search Terms                       | Results |
|-----------|------------------------------------|---------|
| S1        | (MM "Clostridium difficile")       | 7,452   |
| S2        | (MM "Klebsiella pneumoniae")       | 8,828   |
| S3        | S1 OR S2                           | 16,277  |
| S4        | (MM "Drug Resistance, Microbial+") | 68,909  |
| S5        | (MM "Antimicrobial Stewardship")   | 982     |
| S6        | S4 OR S5                           | 69,747  |
| S7        | S3 AND S6                          | 1,649   |
| S8        | (MM "Cross Infection+")            | 42,792  |
| S9        | S7 AND S8                          | 192     |
| S10       | S7 AND S8                          | 187     |

### b. CINAHL Plus

| Search ID | Search Terms                       | Results |
|-----------|------------------------------------|---------|
| S1        | (MM "Clostridium Difficile")       | 2,307   |
| S2        | "klebsiella pneumonia*"            | 2,719   |
| S3        | S1 OR S2                           | 5,023   |
| S4        | (MM "Drug Resistance, Microbial+") | 15,817  |
| S5        | (MM "Antimicrobial Stewardship")   | 427     |
| S6        | S4 OR S5                           | 16,176  |
| S7        | S3 AND S6                          | 719     |
| S8        | (MM "Cross Infection+")            | 27,268  |
| S9        | S7 AND S8                          | 166     |
| S10       | S7 AND S8                          | 160     |
| S11       | S7 AND S8                          | 127     |

### c. Web of Science Core Collection

| Search ID | Search terms                                                  | Results |
|-----------|---------------------------------------------------------------|---------|
| # 1       | TS= "clostridium difficile" OR TS= "clostridioides difficile" | 12,612  |
| # 2       | TS= "klebsiella pneumonia*"                                   | 17,207  |
| # 3       | #2 OR #1                                                      | 29,679  |
| # 4       | TS= "drug resistance"                                         | 50,192  |
| # 5       | TS= "antimicrobial stewardship"                               | 3,586   |
| # 6       | #5 OR #4                                                      | 53,661  |
| # 7       | #6 AND #3                                                     | 1,415   |

|      |                                         |        |
|------|-----------------------------------------|--------|
| # 8  | TS= "cross infection" OR TS= nosocomial | 17,523 |
| # 9  | #8 AND #7                               | 193    |
| # 10 | #8 AND #7                               | 193    |
| # 11 | #8 AND #7                               | 193    |

#### d. PubMed

Search ("Cross Infection"[Majr] AND (((("Klebsiella pneumoniae"[Mesh]) OR "Clostridium difficile"[Mesh])) AND (((("Drug Resistance"[Mesh] OR "Drug Resistance, Multiple, Bacterial"[Mesh] OR "Drug Resistance, Bacterial"[Mesh] OR "Drug Resistance, Microbial"[Mesh])) OR "Antimicrobial Stewardship"[Majr]))) Filters: published in the last 10 years; Humans.
