# Supplementary material for: Antimicrobial stewardship and infection prevention interventions targeting healthcare-associated Clostridioides difficile and carbapenem-resistant Klebsiella pneumoniae infections: a scoping review
Source: PubMed Central journal article supplement — BMJ Open. 2021 Aug 4;11(8):e051983. doi: 10.1136/bmjopen-2021-051983 (PMC8340296; doi:10.1136/bmjopen-2021-051983), 2021-08-04
Supplement: bmjopen-2021-051983supp002.pdf [file bmjopen-2021-051983supp002.pdf]

## Appendix 2: Data Extraction

### Data charting

The researchers developed a form for abstracting data that captured the main study characteristics as well as the specific metrics relevant to the objectives of this scoping review. The form was subjected to preliminary calibration to ensure its accuracy, consistency, and reliability. The data items extracted (see below) included the reference, the study type, the study objectives, population or setting, country, the intervention, intervention duration, healthcare workers involved, outcome measures or findings, and the conclusions of the study. A second reviewer audited 20% the data extracted by the first reviewer for accuracy and completeness.

| STUDIES ON INTERVENTIONS TARGETING CLOSTRIDIUM DIFFICILE IN HEALTHCARE SETTINGS |                                          |                                                                                                                                                 |                                                                                               |                                                                                                                                                           |                                                                                                                                                                                                                                                                                                           |                                                                                                                                       |                                                                                                                   |
|---------------------------------------------------------------------------------|------------------------------------------|-------------------------------------------------------------------------------------------------------------------------------------------------|-----------------------------------------------------------------------------------------------|-----------------------------------------------------------------------------------------------------------------------------------------------------------|-----------------------------------------------------------------------------------------------------------------------------------------------------------------------------------------------------------------------------------------------------------------------------------------------------------|---------------------------------------------------------------------------------------------------------------------------------------|-------------------------------------------------------------------------------------------------------------------|
| Reference                                                                       | Study type                               | Aims/ objectives                                                                                                                                | Population/ Setting                                                                           | Intervention                                                                                                                                              | Outcome/ key findings                                                                                                                                                                                                                                                                                     | Conclusions                                                                                                                           | Useful notes                                                                                                      |
| [42]                                                                            | Retrospective observational time-series. | To examine the effectiveness of an antimicrobial stewardship programme on utilization and cost of antimicrobials in leukemia patients in Canada | Leukemia patients.<br>Canada<br>Multi-site                                                    | Academic detailing (audits and feedback)                                                                                                                  | Utilization of antimicrobials reduced from 278DDD/100 PD to 247 DDD/100 PD<br><br>CDI remained stable                                                                                                                                                                                                     | AMS reduces antimicrobial use but has no effect on mortality                                                                          | Immunosuppressed persons have neutropenia, mostly treated with broad spectrum antibiotics hence high risk for CDI |
| [43]                                                                            | Quasi-experimental                       | To assess the impact of an ASP on antimicrobials use, CDIs, and AMR patterns                                                                    | Rehabilitation hospital<br>150 beds<br>Spinal injuries patients                               | Bedside ID consultation<br><br>Revision of antibiotics prophylaxis protocols<br><br>Staff education                                                       | Abiotics consumption reduced from 42 to 22 DDD/ 100 PDs (Carbapenems from 13 to 0.4 DDD/100PDs, Fluoroquinolones from 11.8 to 0.99 DDD/ 100 PDs)<br><br>CDIs reduced from 3.6 to 1.2 cases per 10000 PDs<br><br>Prevalence of KP reduced from 42% to 17%<br><br>No effect on mortality or length of stay. |                                                                                                                                       |                                                                                                                   |
| [44]                                                                            | Quasi-experimental                       | To optimize the use of antibiotics through trainee-led time outs                                                                                | 679 inpatients<br>Montreal University tertiary care hospital (417 beds)<br>Internal medicine. | Twice-weekly time-out audits using a structured electronic checklist and monthly feedback.<br><br>AMS monthly education: 30 minutes to all rotating staff | A 46% reduction of antibiotics costs from \$149 743 to \$69 424<br><br>78% of the cost reduction linked with reduced use of carbapenems<br><br>80% adherence to the audit                                                                                                                                 | An antibiotic self-stewardship bundle to implement the Centers for Disease Control and Prevention's suggested time-outs seems to have | About 50% use of antibiotics is not necessary or inappropriate                                                    |

|      |                                                 |                                                                                                                                                                                                               |                                                                                                                              |                                                                                                                                                                                                                                                                                                                                                                  |                                                                                                                                                                                                                                                                                                                                                     |                                                                                                                                |                                                                                      |
|------|-------------------------------------------------|---------------------------------------------------------------------------------------------------------------------------------------------------------------------------------------------------------------|------------------------------------------------------------------------------------------------------------------------------|------------------------------------------------------------------------------------------------------------------------------------------------------------------------------------------------------------------------------------------------------------------------------------------------------------------------------------------------------------------|-----------------------------------------------------------------------------------------------------------------------------------------------------------------------------------------------------------------------------------------------------------------------------------------------------------------------------------------------------|--------------------------------------------------------------------------------------------------------------------------------|--------------------------------------------------------------------------------------|
|      |                                                 |                                                                                                                                                                                                               | 2 units, 46 beds                                                                                                             | Involved: Consultants (Infectious diseases expert, critical care, and general medicine)                                                                                                                                                                                                                                                                          | CDI reduced from 24.2 to 19.6 per 10,000 PDs                                                                                                                                                                                                                                                                                                        | reduced overall costs and targeted antibiotic use.                                                                             |                                                                                      |
| [45] | Quasi-experimental                              | To implement an AMS program in a long-term care hospital using telemedicine<br><br>Provide antimicrobial oversight<br><br>To improve the quality of care by standardizing antimicrobial prescribing practices | 212 bed-New England Sinai Hospital in Stoughton Massachusetts<br><br>Oversight undertaken by staff from Tufts Medical Center | CDIs<br>Offsite electronic medical record audit<br><br>Program involved ID physicians and pharmacists                                                                                                                                                                                                                                                            | An overall decrease in antimicrobials use.<br><br>Overall usage of antibiotics reduced by 6.58DDD/1,000 PDs<br><br>A reduction in the incidence of HAIs and CDIs (from 1.4 to 0.57/1000PDs)                                                                                                                                                         | AMS using remote EMR audit is associated with a reduction in antimicrobials use.                                               |                                                                                      |
| [46] | Quasi-experimental                              | To reduce the number of healthcare associated CDI cases                                                                                                                                                       | 450-bed district general hospital<br><br>Hairmyres Hospital (Glasgow, United Kingdom)                                        | A restrictive policy on the use of ceftriaxone and ciprofloxacin<br><br>Educational campaign                                                                                                                                                                                                                                                                     | Overall reduction of targeted antimicrobials (ceftriaxone: 95% and ciprofloxacin: 72.5%) (Ceftriaxone from 46.213 to 2.129 DDD/1000PDs<br>Ciprofloxacin from 109.804 to 30.205 DDDs/1000PDs)<br><br>77% reduction in hospital acquisition of CDIs<br><br>Sustained reduction of CDIs up to 0.259 cases/ 1000 patient-beds 3 years post-intervention | Restricting the two antibiotics significantly reduced healthcare associated CDIs                                               |                                                                                      |
| [47] | Prospective, controlled interrupted time series | To evaluate the impact of audit and feedback on the use of broad-spectrum antimicrobials in critical care patients                                                                                            | Single site<br><br>Tertiary hospital<br><br>Intensive care unit (3)                                                          | Review of all patients on day 3 and 10 after admission with suggestions for optimizing antimicrobial use given to responsible physicians. Then placing a computer-generated progress note on the patient chart, then feedback completed on same day<br><br>Critical care team<br><br>Targeted antimicrobials: ceftriaxone, ceftazidime, piperacillin-tazobactam, | Use of broad-spectrum antimicrobials reduced from 644 to 503 therapy days per 1,000 PDs<br><br>Nosocomial CDIs incidence reduced from 11 to 6                                                                                                                                                                                                       | Prospective audit and feedback appears to be an effective and safe means for reducing the use of broad-spectrum antimicrobials | Approximately half of antibiotics use in hospitals is inappropriate or not necessary |

|      |                                                 |                                                                                                                                                                      |                                                                                                                  |                                                                                                                                                                                                                                                                                                                                         |                                                                                                                                                                                                                                                                                                        |                                                                                                                                                                                                                                              |                                                                                                                                                             |
|------|-------------------------------------------------|----------------------------------------------------------------------------------------------------------------------------------------------------------------------|------------------------------------------------------------------------------------------------------------------|-----------------------------------------------------------------------------------------------------------------------------------------------------------------------------------------------------------------------------------------------------------------------------------------------------------------------------------------|--------------------------------------------------------------------------------------------------------------------------------------------------------------------------------------------------------------------------------------------------------------------------------------------------------|----------------------------------------------------------------------------------------------------------------------------------------------------------------------------------------------------------------------------------------------|-------------------------------------------------------------------------------------------------------------------------------------------------------------|
|      |                                                 |                                                                                                                                                                      |                                                                                                                  | meropenem, ertapenem, levofloxacin, ciprofloxacin, and vancomycin<br><br>Personnel involved: Consultants (Pharmacists, ID physician)                                                                                                                                                                                                    |                                                                                                                                                                                                                                                                                                        |                                                                                                                                                                                                                                              |                                                                                                                                                             |
| [48] | Quasi experimental                              | Assessing the impact of automated tracking and ordering precautions on multidrug resistant organisms (MDROs)                                                         | University of California, Irvine Medical center<br><br>410 beds<br><br>Serves trauma, burns and cancer patients. | An automated system for identifying, tracking CDIs and other MDROs that involved monitoring microbiology results, triggering chart-based alerts, ordering for appropriate contact precautions on admission as well as inactivation of the precautions. The alert was in form of a visual header banner on the electronic health records | Time savings estimated at 43 hours per 1000 admissions<br><br>Timely initiation of contact precautions                                                                                                                                                                                                 | Automated systems integrated within the electronic health records have potential for protecting patients by ensuring precautions are ordered in a timely manner. The system also contributes to time savings for Infection prevention teams. | No report on CDI outcomes                                                                                                                                   |
| [49] | Quasi-experimental                              | To assess the effect of biocidal copper oxide impregnated linen on HCAs<br><br>CDIs                                                                                  | Multi-site (six hospitals).<br><br>Sentara Albermarle Healthcare hospitals<br><br>1019 beds<br><br>NC, USA       | Replacement of linen with copper oxide impregnated linen                                                                                                                                                                                                                                                                                | A reduction in C. diff associated HCAs by 41.1-61.2% per 10,000 PDs during the intervention period                                                                                                                                                                                                     | The use of the biocidal impregnated copper-oxide linen significantly reduced C. diff associated HCAs as well as other MDROs                                                                                                                  | Copper has some biocidal activity against some drug resistant bacteria. Its use in hospital environments potentially reduces the bioburden of HCA pathogens |
| [50] | Quasi-experimental                              | To examine the effect of copper impregnated linens on MDROs and CDIs                                                                                                 | Long-term acute care hospital (LTACH).<br><br>40-beds<br><br>Charlottesville, Virginia                           | Copper-impregnated linens including bedsheets, pillowcases, towels, and washcloths                                                                                                                                                                                                                                                      | Copper linens were associated with a much higher rate of CDIs. (1.5 to 2.8 cases per 1000PDs)<br><br>There was a reduction in the compliance with hand hygiene practices (-5.6%)                                                                                                                       | There was no beneficial effect of the copper impregnated linens                                                                                                                                                                              | No blinding of staff members                                                                                                                                |
| [51] | Secondary analysis of a multicenter cluster RCT | To assess the effectiveness of disinfection strategies on C. diff incidence in hospital settings<br><br>BETR (Benefits of enhanced terminal room) disinfection study | Multisite: 9 hospitals in southeastern USA                                                                       | Four disinfection strategies post-discharge of MDRO or C. diff patients:<br><br>Standard disinfection with quaternary ammonium solution or 10% hypochlorite (bleach) for C. diff cases.<br><br>Standard disinfection and ultraviolet (UV) light or bleach and UV light for C. diff cases.<br><br>Bleach strategy with 10% hypochlorite  | No significant differences in the hospital-wide risk of the target organisms between standard disinfection and the other three enhanced disinfection strategies.<br><br>The use of UV light as part of the disinfection strategy significantly reduced the risk of C. diff (from 18.1 to 17.2/1000PDs) | Enhanced terminal room disinfection using UV light contributed to a reduction in the risk of C. diff and VRE.<br><br>Enhanced terminal room disinfection overcomes the challenges of standard                                                | Contaminated healthcare environments act as sources of infectious pathogens hence the importance of enhanced terminal room disinfection.                    |

|      |                                                                 |                                                                                                                                      |                                                                                                                                   |                                                                                                                                                                                                                                                                                           |                                                                                                                                                                                                                                                                                                                                                            |                                                                                                      |                                                                                                        |
|------|-----------------------------------------------------------------|--------------------------------------------------------------------------------------------------------------------------------------|-----------------------------------------------------------------------------------------------------------------------------------|-------------------------------------------------------------------------------------------------------------------------------------------------------------------------------------------------------------------------------------------------------------------------------------------|------------------------------------------------------------------------------------------------------------------------------------------------------------------------------------------------------------------------------------------------------------------------------------------------------------------------------------------------------------|------------------------------------------------------------------------------------------------------|--------------------------------------------------------------------------------------------------------|
|      |                                                                 |                                                                                                                                      |                                                                                                                                   | Bleach and UV light                                                                                                                                                                                                                                                                       |                                                                                                                                                                                                                                                                                                                                                            | disinfection and potentially reduces acquisition of <i>C. diff</i> and other MDROs.                  |                                                                                                        |
| [52] | Quasi-experimental.<br>Retrospective pre- and post-intervention | To assess the impact of an ASP intervention on HA-CDI                                                                                | The Western Pennsylvania Hospital (WPH).<br><br>317-bed community teaching hospital.<br><br>Approximately 6800 admissions yearly. | Education.<br><br>Restriction of target antimicrobials requiring prior approval.<br><br>Audit and feedback.<br><br>Annual guidelines for antimicrobials use.                                                                                                                              | Significant reduction in HA-CDIs from 0.84 to 0.28 cases per 1000PDs (P=0.035).<br><br>A cumulative reduction in the use of clindamycin, ceftriaxone, carbapenems, fluoroquinolones, linezolid, tigecycline (from 295.1 to 261.3 DDD/1000PDs)                                                                                                              | Implementing an ASP program significantly reduced the incidence of HA-CDI as well as antibiotics use | Antibiotics associated with higher rates of CDI include fluoroquinolones, clindamycin, and ceftriaxone |
| [53] | Pre- and post-intervention                                      | To assess the impact of intensive IPC activities on MRSA, drug resistant <i>P. aeruginosa</i> (DRP), and <i>C. diff</i> acquisition. | Tsukuba Medical Center Hospital (TMCH)<br><br>Japan.<br><br>409 beds.<br><br>Tertiary emergency medical center.                   | Screening and notification of new and previous MDROs.<br><br>Daily review of new patients' medical records/ microbiological results.<br><br>Contact precautions or standard precautions.<br><br>Monitoring inappropriate use of carbapenems and promptly instructing responsible doctors. | Reduction of carbapenems' use from 28.5 to 17.8 DDD/1000PDs.<br><br>Improved uptake of contact precautions.<br><br>A reduction in the incidence of CDI (from 0.47 to 0.11 cases/1000PDs). Incidence of MRSA and DRP also reduced significantly                                                                                                             | Proactive intensive ICT measures have the potential for reducing the hospital transmission of MDROs. |                                                                                                        |
| [54] | Prospective observational study                                 | To assess the impact of a technology-mediated pharmacy-directed ASP in a rural hospital                                              | St. Mary Medical center.<br><br>141 beds.<br><br>Community hospital.<br><br>Washington                                            | Weekly antimicrobial review teleconferences involving an ID pharmacist                                                                                                                                                                                                                    | Pharmacy-initiated AMS interventions increased from 2.1 to 6.8 interventions per week.<br><br>Antimicrobial streamlining improved from 44% to 96%.<br><br>There was enhanced interdisciplinary collaboration.<br><br>A 51% reduction in the cost of targeted antimicrobials.<br><br>Healthcare associated CDIs reduced from 5.5 to 1.6 cases per 10,000PDs |                                                                                                      |                                                                                                        |

| [55]                                                                  | Retrospective observational cross-sectional study                            | To assess the effect of intensive staff education on CDIs amongst hospitalized geriatrics                                                 | 390-bed geriatric hospital<br><br>217 geriatric patients observed                                                                     | Staff education on isolation precautions, handwashing, transporting patients within the hospital, and cleaning.                                                                                                                                                                                                                            | There were no significant differences in the incidence of CDIs pre- and post-intervention.                                                                                                                                | Intensive staff education did not reduce the nosocomial CDI rates but remains an important strategy                                                          | Toxin positive <i>C. diff</i> is the leading cause of diarrhea amongst geriatrics. |
|-----------------------------------------------------------------------|------------------------------------------------------------------------------|-------------------------------------------------------------------------------------------------------------------------------------------|---------------------------------------------------------------------------------------------------------------------------------------|--------------------------------------------------------------------------------------------------------------------------------------------------------------------------------------------------------------------------------------------------------------------------------------------------------------------------------------------|---------------------------------------------------------------------------------------------------------------------------------------------------------------------------------------------------------------------------|--------------------------------------------------------------------------------------------------------------------------------------------------------------|------------------------------------------------------------------------------------|
| [56]                                                                  | Retrospective cohort study                                                   | To assess the impact of real-time notification upon detecting toxigenic <i>C. difficile</i>                                               | Single center.<br><br>433 bed tertiary care medical center.<br><br>Lexington, Kentucky.<br><br>Adult patients aged more than 18 years | Computer generated real-time notification of toxigenic <i>C. diff</i> results and<br><br>Initiation of appropriate antimicrobial therapy (Vancomycin or Vancomycin and metronidazole).<br><br>Contact precautions.                                                                                                                         | The time for initiating appropriate treatment reduced from 5.75 to 2.05 hours.<br><br>The ASP intervention shortened the time from diagnosis to recording the appropriate antimicrobial in the electronic medical records | The real-time notification intervention reduced the time for entering and initiating the appropriate antimicrobial treatment as well as contact precautions. |                                                                                    |
| [57]                                                                  | Quasi-experimental                                                           | To assess the impact of collaborative intervention on hospital onset <i>C. difficile</i>                                                  | 35 acute hospitals<br>New York                                                                                                        | IP bundle and environmental cleaning protocol<br><br>Standard IP precautions and environmental cleaning protocols were monitored using checklists.<br><br>Monthly teleconferences to discuss challenges and successes also implemented.<br><br>Incidence of CDIs monitored monthly<br><br>Intervention overseen by interdisciplinary teams | Significant reduction in hospital onset CDIs was reported<br><br>95% compliance with IP precautions<br><br>96% compliance with environmental cleaning protocol<br><br>37% reduction in the absolute risk of CDIs          |                                                                                                                                                              |                                                                                    |
| <b>STUDIES ON INTERVENTIONS TARGETING CRKP IN HEALTHCARE SETTINGS</b> |                                                                              |                                                                                                                                           |                                                                                                                                       |                                                                                                                                                                                                                                                                                                                                            |                                                                                                                                                                                                                           |                                                                                                                                                              |                                                                                    |
| Reference                                                             | Study type                                                                   | Aims/ objectives                                                                                                                          | Population/ Setting                                                                                                                   | Intervention                                                                                                                                                                                                                                                                                                                               | Outcome/ key findings                                                                                                                                                                                                     | Conclusions                                                                                                                                                  | Useful notes                                                                       |
| [58]                                                                  | Retrospective observational<br><br>Quasi-experimental<br><br>Medical records | To devise a local strategy for eradication of a hospital-wide outbreak caused by carbapenem-resistant <i>Klebsiella pneumoniae</i> (CRKP) | Carbapenem-resistant <i>Klebsiella pneumoniae</i> CRKP patients<br>1000 bed tertiary care university hospital                         | Emergency department flagging system<br>Cohorting<br>Eradicating clusters<br>Environmental and personnel hand cultures<br>Carbapenem restriction policy                                                                                                                                                                                    | CRKP infections reduced from 5.26 to 0.18 per 10,000 patient days<br>No nosocomial CRKP infections diagnosed<br>Meropenem use reduced                                                                                     |                                                                                                                                                              |                                                                                    |
| [59]                                                                  | Quasi-experimental?                                                          | To examine the effect of active screening on the                                                                                          | Intensive care unit (ICU)                                                                                                             | Active screening                                                                                                                                                                                                                                                                                                                           | Improved detection of MDROs (KP)                                                                                                                                                                                          | Active screening reduces the resistance rates of pathogenic bacteria                                                                                         |                                                                                    |

|      |                           |                                                                                           |                                                                                                               |                                                                                                                                                                                                                                                                                                                                                                                                                                                                                                                                                                       |                                                                                                                                                                                                                                                                                                                                                                                                          |                                                                                                                                                                                |                                                                                                                                                                              |
|------|---------------------------|-------------------------------------------------------------------------------------------|---------------------------------------------------------------------------------------------------------------|-----------------------------------------------------------------------------------------------------------------------------------------------------------------------------------------------------------------------------------------------------------------------------------------------------------------------------------------------------------------------------------------------------------------------------------------------------------------------------------------------------------------------------------------------------------------------|----------------------------------------------------------------------------------------------------------------------------------------------------------------------------------------------------------------------------------------------------------------------------------------------------------------------------------------------------------------------------------------------------------|--------------------------------------------------------------------------------------------------------------------------------------------------------------------------------|------------------------------------------------------------------------------------------------------------------------------------------------------------------------------|
|      |                           | resistance rates of MDROs in ICUs                                                         |                                                                                                               |                                                                                                                                                                                                                                                                                                                                                                                                                                                                                                                                                                       |                                                                                                                                                                                                                                                                                                                                                                                                          | and useful in detecting MDRO                                                                                                                                                   |                                                                                                                                                                              |
| [60] | Quasi-experimental        | To reduce the prevalence of CRKP                                                          | Medical center Israel                                                                                         | Guidelines for isolation, cohorting, environmental cleaning, staff education, and computerized notification/ flagging                                                                                                                                                                                                                                                                                                                                                                                                                                                 | A decrease in the CRKP incidence rate sustained over 30 months from 6.6 to 0.5/10,000PDs<br><br>Reduction in cross-infections from 6% to 2.7%<br><br>Surveillance of asymptomatic carriers improved from 20% to 89%                                                                                                                                                                                      | A multidisciplinary IP programme is effective in controlling the prevalence of CRKP                                                                                            |                                                                                                                                                                              |
| [61] | Quasi-experimental        | To optimize the use of antimicrobials                                                     | 510-bed Danish university hospital<br><br>Copenhagen University Hospital-Denmark                              | Multi-disciplinary change project<br><br>Kotter's stages of change<br><br>Multi-level intervention:<br><br>1. Professional: Education, clinician leaflets, new drug container, yellow sticker for bed post, signboard for doors, hotline, notification on prescription of restricted antimicrobials<br><br>2. Social: Presentations for the quality board, prevalence studies, feedback, newsletter, and website.<br><br>3. Patient: Information leaflets for isolation precautions<br><br>Organizational: Revising antimicrobial guidelines, cefuroxime restriction. | Overall antimicrobials consumption remained unaffected.<br><br>Immediate and sustained reduction in cefuroxime use (74.5%)<br><br>An increase in the use of ertapenem, piperacillin/ tazobactam, and beta-lactamase sensitive penicillin.<br><br>Reduction in ESBL-KP diagnostic samples<br><br>Reduced incidence of ESBL-KP infections from 39.5 to 22.5%<br><br>Reduced need for isolation precautions | Changing antimicrobial consumption and reducing the incidence of ESBL-KP is possible through a multi-faceted intervention that does not require ongoing antibiotic stewardship | Restricting cephalosporins may reduce ESBL infection rates<br><br>Carbapenems (beta-lactamase inhibitors) are recommended as first-lines for serious ESBL producing bacteria |
| [62] | Quasi-experimental        | To evaluate the impact of an AMS program restricting carbapenems (imipenem and meropenem) | Hospital das Clinicas<br><br>Institute of Orthopedics and Traumatology<br><br>200 beds tertiary care hospital | Ertapenem was made mandatory for treatment of ESBL-Enterobacteriaceae<br><br>Restricting group 2 carbapenems for gram negative bacteria                                                                                                                                                                                                                                                                                                                                                                                                                               | A reduction of group 2 carbapenems use from 61.1 DDD to 48.7 DDD/1,000 patient days<br><br>Susceptibility of <i>K. pneumoniae</i> and <i>P. aeruginosa</i> to trimethoprim-sulfamethoxazole                                                                                                                                                                                                              | There was a significant reduction in the use of carbapenems following preferential use of ertapenem.                                                                           |                                                                                                                                                                              |
| [63] | Prospective Observational | To contain an outbreak of CRKP                                                            | 27 Acute care hospitals<br><br>Israel<br><br>14,000 beds                                                      | Screening<br><br>Mandatory reporting of every CRKP patient to PH authorities<br><br>Mandatory isolation of hospitalized new and previous carriers (single rooms or cohorting)                                                                                                                                                                                                                                                                                                                                                                                         | Increase in the incidence of KP was halted with a subsequent reduction of 11.7 cases per 100,000                                                                                                                                                                                                                                                                                                         | An intervention coordinated centrally showed better outcomes for containment of a KP outbreak as compared to local measures. Strategic planning and                            | <b>Outbreak control</b>                                                                                                                                                      |

|      |                                 |                                                                                                         |                                                             |                                                                                                                                                                                                             |                                                                                                                              |                                                                                                                   |                                                                                                                                                                                                                                                                |
|------|---------------------------------|---------------------------------------------------------------------------------------------------------|-------------------------------------------------------------|-------------------------------------------------------------------------------------------------------------------------------------------------------------------------------------------------------------|------------------------------------------------------------------------------------------------------------------------------|-------------------------------------------------------------------------------------------------------------------|----------------------------------------------------------------------------------------------------------------------------------------------------------------------------------------------------------------------------------------------------------------|
|      |                                 |                                                                                                         |                                                             | Dedicated staff<br>Oversight taskforce that supervised adherence to isolation protocols, provided technical support, and feedback to management                                                             |                                                                                                                              | national oversight are crucial in addressing AMR                                                                  |                                                                                                                                                                                                                                                                |
| [64] | Quasi experimental              | To curb the spread of KPC-3 producing KP                                                                | Italy<br>12-bed ICU hospital<br>Cannizaro hospital, Catania | Screening<br>Environmental cleaning<br>Respiratory equipment disinfection<br>Hand hygiene<br>Single room isolation<br>Weekly meetings between IP and ICU staff                                              | Outbreak containment within 4 months<br>Improved adherence to contact precautions                                            |                                                                                                                   | <b>Outbreak control</b><br>Ten recognized KPC types (KPC-2 to KPC 11). KPC-2 are the commonest                                                                                                                                                                 |
| [65] | Prospective observational study | To curb CRKP and Acinetobacter baumannii                                                                | Greece<br>Serres General Hospital<br>250-bed hospital       | Prokroustes action plan:<br>Surveillance and compulsory notification and IP measures: Isolation or cohorting, contact precautions, hand hygiene                                                             | Containment of CRKP three years post-intervention.<br>An increase in CRKP resistant to Colistin, Tigecycline, and gentamycin | There exist challenges for addressing MDROs in regions with established carbapenem resistance.                    |                                                                                                                                                                                                                                                                |
| [66] | Observational                   | To identify and control CRKP originating from endoscopic equipment                                      | 206-beds cancer center + 988 beds tertiary hospital         | Active surveillance using rectal swabs<br>Source isolation<br>Contact precautions<br>Environmental cleaning<br>Hand hygiene<br>PPE: Gowns and gloves<br>MDRO flags on electronic medical records and charts | Seven CRKP cases identified resistant to imipenem                                                                            |                                                                                                                   | Transmission of carbapenem resistant genes across microbial species within the same environment contributes to resistance.<br>KP outbreaks have also been associated with contaminated sinks, intravenous saline solutions, bath soap, and ultrasonography gel |
| [67] | Quasi-experimental              | To assess the impact of intensified IC measures on colonization and infections associated with CRKP, P. | Solid organ transplant department                           | Active surveillance + contact precautions + hand hygiene + education + environmental cleaning + monitoring adherence + audit and feedback                                                                   | Reduction in incidence of colonization from 19 to 9%.<br>Improved adherence to contact precautions.                          | In CR gram negative bacteria endemic regions, SOT patients have disproportionately higher infections rates of the |                                                                                                                                                                                                                                                                |

|      |                                                      |                                                                                                              |                                                                               |                                                                                                                                                                                                                                                                                                                  |                                                                                                                                                                           |                                                                                                                                                                                            |  |
|------|------------------------------------------------------|--------------------------------------------------------------------------------------------------------------|-------------------------------------------------------------------------------|------------------------------------------------------------------------------------------------------------------------------------------------------------------------------------------------------------------------------------------------------------------------------------------------------------------|---------------------------------------------------------------------------------------------------------------------------------------------------------------------------|--------------------------------------------------------------------------------------------------------------------------------------------------------------------------------------------|--|
|      |                                                      | aeruginosa, and<br>Actionbater<br>baumannii                                                                  |                                                                               |                                                                                                                                                                                                                                                                                                                  | An increase in the monthly incidence of<br>CRKP from 2.8 to 6.9/ 1000 PDs                                                                                                 | organisms.<br>Implementation of<br>enhanced IP<br>measures<br>significantly<br>reduces the<br>colonization                                                                                 |  |
| [68] | Prospective<br>observational<br>study                | To control an<br>outbreak of<br>imipenem resistant<br>K. pneumoniae (IR-<br>KP)                              | France<br><br>Abdominal surgery<br>care center.<br><br>15-bed liver ICU       | Screening all patients and Contact<br>isolation and hand hygiene using<br>alcohol-based hand sanitizer.<br><br>Enhanced measures: Cohorting carriers,<br>dedicated staff, restricting ward<br>admissions, and strict control of patient<br>transfers                                                             | Rapid containment of the outbreak                                                                                                                                         |                                                                                                                                                                                            |  |
| [69] | Quasi-<br>experimental                               | To establish if IPC<br>interventions can<br>reduce CRKP<br>infection in ICU                                  | ICU<br><br>China<br><br>629 patients<br>enrolled.                             | Screening of cultures, de-escalation<br>interventions, contact precautions,<br>isolation/ cohorting, sterilization and<br>disinfection, and bundles (for IV<br>catheter infections, ventilator associated<br>pneumonia, catheter associated urinary<br>tract infections, and skin or soft tissue<br>infections). | CRKP incidence reduced from 10.08 to<br>a low of 2.84 cases per 1000 PDs. ICU<br>acquired CRKP bloodstream infections<br>decreased from 2.54 to 0.41 cases per<br>1000PDs | Comprehensive IPC<br>interventions<br>significantly<br>reduced ICU related<br>CRKP infections                                                                                              |  |
| [70] | Quasi-<br>experimental                               | To assess the effect<br>of IP on a CRKP<br>outbreak                                                          | Neonatal ICU.<br><br>20-beds                                                  | Active surveillance using rectal swabs.<br><br>IPC measures: hand hygiene, auditing<br>compliance, environmental cleaning,<br>and cohorting.                                                                                                                                                                     | Outbreak containment after cohorting<br>and IPC measures.                                                                                                                 | Physical isolation is<br>important in<br>preventing the<br>spread of MDROs.<br><br>ASP is useful in<br>reducing the spread<br>of MDROs                                                     |  |
| [71] | Cohort.<br><br>Prospective<br>observational<br>study | Assessing the<br>effectiveness of<br>multidisciplinary<br>interventions on the<br>transmission of<br>ESBL-KP | Parkland Memorial<br>Hospital, Dallas.<br><br>Neonatal ICU.<br><br>61 infants | Re-educating staff.<br><br>Auditing hand hygiene and<br>environmental sanitation.<br><br>Contact precautions.<br><br>Cohorting Staff & infants.<br><br>Reducing overcrowding.<br><br>Screening Neonatal ICU cultures<br>frequently.                                                                              | Outbreak contained within three weeks                                                                                                                                     | Multidisciplinary<br>intervention using<br>standard IPC<br>measures halted the<br>transmission of<br>extended spectrum<br>beta-lactamase<br>(ESBL) producing<br>KP in the Neonatal<br>ICU. |  |
| [72] | Retrospective<br>observational<br>study              | To halt the spread<br>of CRKP                                                                                | Cà Granda Ospeda-<br>le Maggiore<br>Hospital.                                 | Active surveillance.<br><br>Isolation.                                                                                                                                                                                                                                                                           | Outbreak containment                                                                                                                                                      |                                                                                                                                                                                            |  |



|      |                                                 |                                                                                                 |                                                                                                  |                                                                                                                                                                              |                                                                                                                                                                                                                                                                                                                |                                                                                                                                             |                                                                                                          |
|------|-------------------------------------------------|-------------------------------------------------------------------------------------------------|--------------------------------------------------------------------------------------------------|------------------------------------------------------------------------------------------------------------------------------------------------------------------------------|----------------------------------------------------------------------------------------------------------------------------------------------------------------------------------------------------------------------------------------------------------------------------------------------------------------|---------------------------------------------------------------------------------------------------------------------------------------------|----------------------------------------------------------------------------------------------------------|
|      |                                                 |                                                                                                 | ICU.<br>Milan, Italy                                                                             | Hand hygiene                                                                                                                                                                 |                                                                                                                                                                                                                                                                                                                |                                                                                                                                             |                                                                                                          |
| [73] | Prospective observational study                 | To assess the effect of enhanced contact precautions on CRE/CRKP incidence and resistance rates | Tertiary care university hospital.<br>900 beds.<br>South Korea                                   | Staff education<br>Contact precautions without active surveillance.<br>Cohort isolation.<br>Hand hygiene                                                                     | An initial increase of the CRE cases (from 1.62 to 9.81/100,000PDs) after which the rates fell back to (0.882/100,000PDs) below baseline levels.<br>A reduction in the resistance rates to imipenem and meropenem following enhanced contact precautions.<br>Hand hygiene adherence improved from 35.2% to 70% | Enhanced infection control measures without active surveillance appear to be effective against the spread of CRE in low prevalence settings |                                                                                                          |
| [74] | Retrospective & Prospective observational study | To stop the spread of ESBL-producing nosocomial bacteria in NICU                                | 17-bed NICU.<br>355 patients observed.<br>University of Szeged Pediatrics Department.<br>Hungary | Introduction of the INSURE protocol.<br>Antimicrobial regimens review.<br>Microbiological screening.<br>Bathing protocol.<br>Hand hygiene.<br>Continuous monitoring of cases | A significant reduction in the proportion of CRKP colonization or infections.<br>Average number of PDs reduced from 343.72 to 292.44 PDs/ month.<br>Hand hygiene compliance improved from 26.02 to 33.6 hand hygiene procedures per patient per hospital day.                                                  | A successful roll back of the CRE infections and colonization was achieved through an interdisciplinary approach.                           | ESBL-producing bacteria includes <i>E. coli</i> , <i>Enterobacter cloacae</i> , and <i>K. pneumoniae</i> |
| [75] | Quasi-experimental                              | To track an outbreak of ESBL-KP using whole genome sequencing                                   | The University Medical Center Groningen (UMCG).<br>1300 bed tertiary care center.<br>Netherlands | Screening patients and the environment using whole genome sequencing                                                                                                         | There was no association between the sporadic case of KP and those that had been diagnosed prior to 2013                                                                                                                                                                                                       | Tailor-made makers for identifying genomic signatures have potential for improving the efficiency of IP measures                            |                                                                                                          |

### Abbreviation footnotes

CDI, *Clostridioides difficile* infections; CRKP, Carbapenem-resistant *Klebsiella pneumoniae* DDD, Daily defined dose; ESBL, Extended spectrum beta-lactamase; HAIs, Healthcare associated infections; ICU, Intensive care unit; ID, Infectious diseases; IP, Infection prevention; MDROs, Multidrug resistant organisms; PD, Patient days; PH, Public health
